# Supplementary material for: Iodide-substitution-induced phase transition of chemical-vapor-deposited MoS2
Source: Royal Society of Chemistry journal article supplement (doi:10.1039/d1tc05413a), 2021-12-30
Supplement: d1tc05413a1.pdf [file d1tc05413a1.pdf]

**Supporting Information**

# Iodide Substitution Induced Phase Transition of Chemical Vapor Deposited MoS<sub>2</sub>

*Tianfu Zhang<sup>1,2</sup>, Zimeng Zeng<sup>1</sup>, Xiaoyang Xiao<sup>1</sup>, Zhongzheng Huang<sup>1,2</sup>, Jie Zhao<sup>1</sup>,  
Yuxin Zhao<sup>1</sup>, Yuanhao Jin<sup>1,3</sup>, Jiaping Wang<sup>1,2</sup>, Shoushan Fan<sup>1,2</sup>, Qunqing Li<sup>1,2\*</sup>*

<sup>1</sup>Department of Physics, State Key Laboratory of Low-Dimensional Quantum Physics  
and Tsinghua-Foxconn Nanotechnology Research Center, Tsinghua University,  
Beijing 100084, P. R. China

<sup>2</sup>Frontier Science Center for Quantum Information, Beijing 100084, P. R. China

<sup>3</sup>Department of Mechanical Engineering, Tsinghua University, Beijing 100084, China

\*E-mail: [qunqli@mail.tsinghua.edu.cn](mailto:qunqli@mail.tsinghua.edu.cn)

Collaborative Innovation Center of Quantum Matter, Beijing, China

\*Corresponding author. Tel.: +86 10 62796019; Fax: +86 10 62792457.

E-mail address: QunqLi@mail.tsinghua.edu.cn

### 1. AFM image for MoS<sub>2</sub> before and after KI treatment.

The AFM image for MoS<sub>2</sub> after treatment was almost identical to that before treatment, which shows almost no extra contamination residual was introduced to the

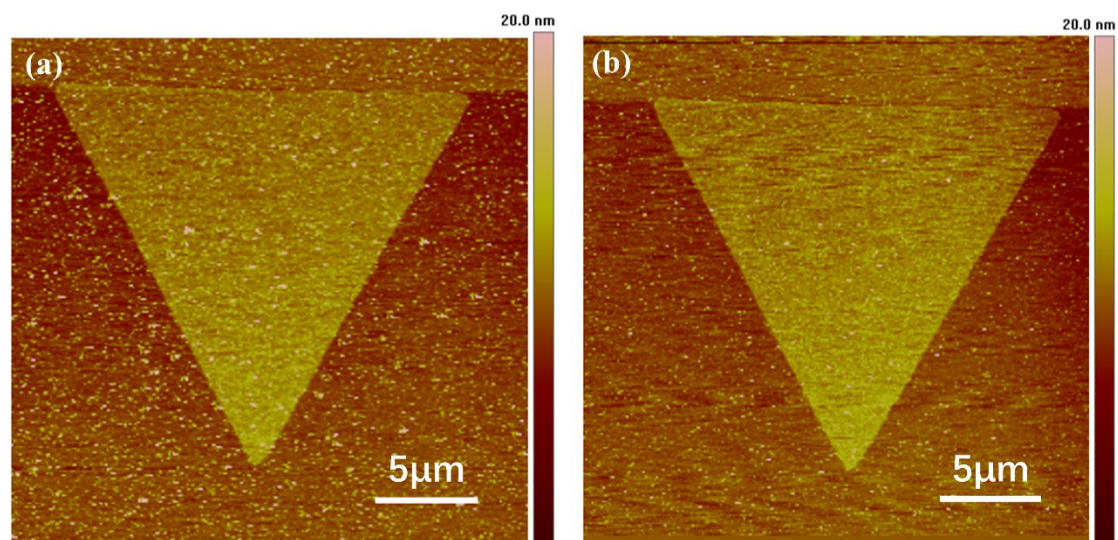

surface of MoS<sub>2</sub> as well as the excellent integrity of sample.

**Fig. S1.** (a) AFM image of CVD-grown MoS<sub>2</sub> before KI treatment. (b) AFM image of same MoS<sub>2</sub> after KI treatment.

## 2.Raman spectra for MoS<sub>2</sub> soaked in KI solution for 2 days

The experiment of soaking MoS<sub>2</sub> into KI solution for 2 days was carried, and then Raman analysis was implemented. The Raman spectra is shown below. It is almost identical with spectra of MoS<sub>2</sub> dipped for 20 mins.

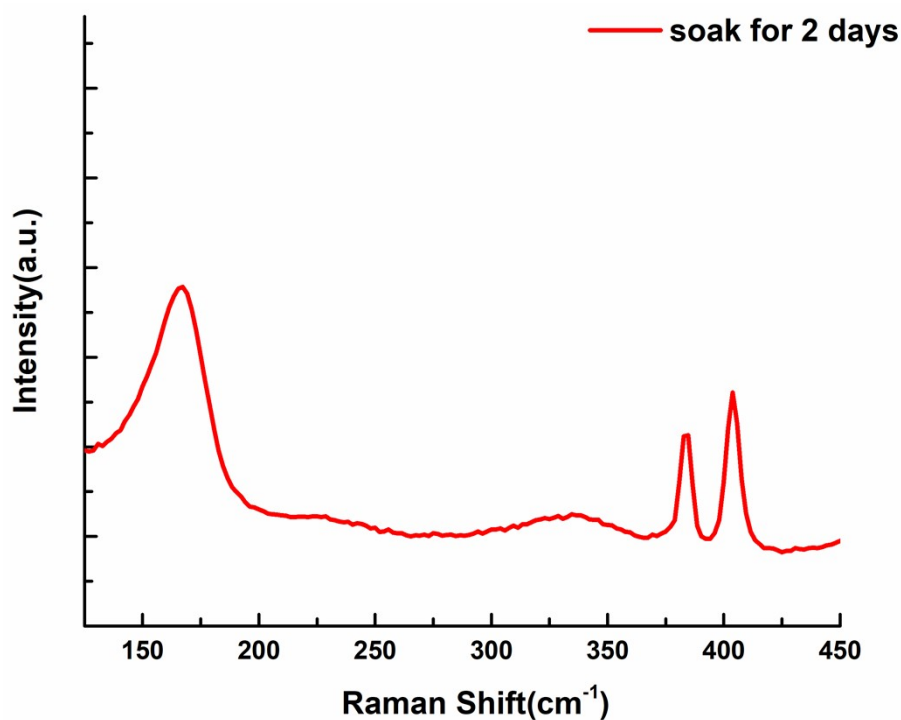

**Fig. S2.** Raman spectra of the MoS<sub>2</sub> soaked into KI solution for 2 days.

### 3. Stability of MoS<sub>2</sub> undergone the phase transition by KI treatment.

Raman spectra of MoS<sub>2</sub> was acquired after being treated with KI, and J<sub>1</sub>, J<sub>2</sub> and J<sub>3</sub> were observed. Then same sample was placed in air and tested 5 days, 10 days and 30 days later respectively. The results showing that J<sub>1</sub>, J<sub>2</sub> and J<sub>3</sub> were clear and almost identical even placed under ambient condition for one month. This result shows good stability of MoS<sub>2</sub> treated with KI treatment.

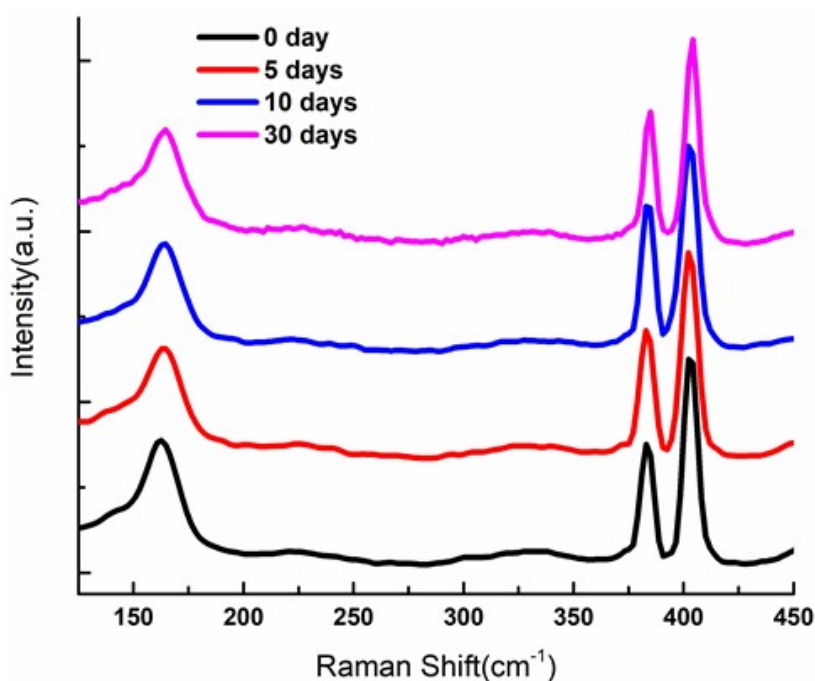

**Fig. S3.** Raman spectra of same MoS<sub>2</sub> under ambient condition 5 days, 10 days and 30 days after KI treatment.

#### 4. Calculation method

All calculations are done using the calculation tool vasp<sup>1</sup> based on density functional theory. A  $6\times 6\times 1$  k grid mesh is used in the calculation. The Perdew–Burke–Ernzerhof form generalized gradient approximation is used to consider the exchange correlation energy between electrons. The cutoff energy of the plane wave basis set is always set to 530eV. In order to consider the single-layer problem, there is a vacuum layer of at least 15Å in the c direction to ensure that the interaction between the layers is negligible. The atom and the lattice are fully optimized until the force on the atom is less than 0.1 eV/Å. The calculated energy band of the undoped 2H phase MoS<sub>2</sub> under similar parameters is consistent with the previous results<sup>3</sup>, which also proves the reliability of the calculation.

## 5. Optical microscope image of the MoS<sub>2</sub> transistors.

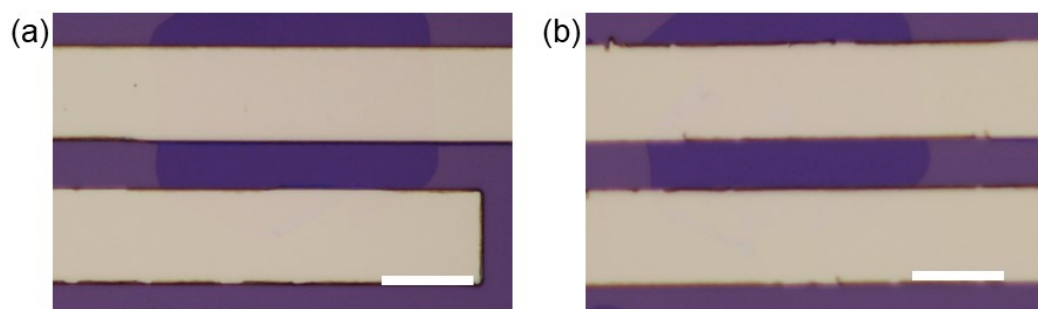

**Fig. S4.** (a) Normal MoS<sub>2</sub> transistor fabricated with standard process. (b) MoS<sub>2</sub> transistor with selected-area phase transition treatment. Scale bars in both figures was 20  $\mu\text{m}$ .

## 6. Contact resistance extraction of the MoS<sub>2</sub> transistors.

The contact resistance of MoS<sub>2</sub> transistor with and without KI treatment were extracted respectively. The simplified I-V equation can be expressed as<sup>2</sup>

$$I_D = \frac{\mu_0}{1 + \theta(V_{gs} - V_{th})} C_0 V_{ds} \frac{W}{L} (V_{gs} - V_{th}) \quad 1$$

With  $\theta \approx \mu_0 C_0 R_c W/L$ ,  $R_c$  can be extracted from the strong inversion region. The low-field mobility ( $\mu_o$ ) and threshold voltage ( $V_{th}$ ) here can be extracted via Y-function method with the simplified expression

$$Y = \frac{I_d}{\sqrt{g_m}} = \sqrt{\mu_0 C_0 V_{ds} \frac{W}{L} (V_{gs} - V_{th})} \quad 2$$

The  $g_m$  here is the transconductance defined as  $dI_d/dV_{gs}$ ,  $C_o$  is the gate capacitance per unit area. From the linear fit in the strong inversion region,  $V_{th}$  and  $\mu_o$  can be extracted from the intercept and the slope, respectively. Then substitute them into Eq 1, value of  $\theta$  can be acquired as well as that of  $R_c$ . Using this method,  $\mu_o$  of MoS<sub>2</sub> FET treated with KI and normal MoS<sub>2</sub> FET were extracted as 3.51 and 0.32 cm<sup>2</sup>/Vs respectively, and the contact resistance  $R_c$  were 59 and 1.94×10<sup>4</sup> kΩ·μm, respectively. The substantially reduction of contact resistance was just caused by KI treatment.

## Reference

1. G. Kresse, J. Furthmuller, *Phys. Rev. B.*, 1996, **54**, 11169-11186.
2. Chang, H. Y. , W. Zhu , and D. Akinwande. *Appl. Phys. Lett.*, 2014, **104**, 699-712.

3. The Materials, P. Materials Data on MoS<sub>2</sub> (SG:164) by Materials Project. The Materials Project 2017. <https://materialsproject.org/materials/mp-1023939/> (accessed Oct 8, 2021).
